# Supplementary material
Source: PubMed Central journal article supplement (PMC5617641)
Supplement: NIHMS881252-supplement-Supplemental.pdf [file NIHMS881252-supplement-Supplemental.pdf]

**Supplemental Table 1. Cox Regression Results for All-Site, Testicular, and Thyroid Cancer: Risk of cancer in first- and second-degree relatives of men with SA compared to fertile controls.**

|                                                    | <u>All-Site:<br/>FDR</u> | <u>All-Site: SDR</u> | <u>Testicular:<br/>FDR</u> | <u>Testicular:<br/>SDR</u> | <u>Thyroid:<br/>FDR</u> | <u>Thyroid:<br/>SDR</u> |
|----------------------------------------------------|--------------------------|----------------------|----------------------------|----------------------------|-------------------------|-------------------------|
| <b>Model 1: Infertile vs. Fertile Controls</b>     | HR (95% CI)              | HR (95% CI)          | HR (95% CI)                | HR (95% CI)                | HR (95% CI)             | HR (95% CI)             |
| Infertile                                          | 0.98<br>(0.93,1.02)      | 0.98<br>(0.96,1.01)  | 1.52<br>(1.05,2.22)        | 1.12<br>(0.84,1.49)        | 1.04<br>(0.84,1.29)     | 1.01<br>(0.85,1.18)     |
| <b>Model 2: Concentration vs. Fertile Controls</b> |                          |                      |                            |                            |                         |                         |
| Azoospermia                                        | 0.91<br>(0.75,1.11)      | 1.00<br>(0.91,1.10)  | 0.84<br>(0.20,3.46)        | 1.20<br>(0.42,3.45)        | 2.12<br>(1.26,3.57)     | 1.57<br>(1.03,2.39)     |
| Oligozoospermic                                    | 1.04<br>(0.91,1.18)      | 1.00<br>(0.94,1.07)  | 1.59<br>(0.78,3.25)        | 0.82<br>(0.41,1.63)        | 1.13<br>(0.73,1.75)     | 0.82<br>(0.56,1.19)     |
| Normozoospermic                                    | 0.99<br>(0.93,1.05)      | 0.99<br>(0.96,1.02)  | 1.9<br>(1.26,2.85)         | 1.26<br>(0.91,1.75)        | 1.06<br>(0.82,1.36)     | 0.97<br>(0.80,1.18)     |
| Hyperzoospermic                                    | 0.95<br>(0.88,1.02)      | 0.97<br>(0.94,1.00)  | 1.03<br>(0.60,1.75)        | 0.98<br>(0.65,1.46)        | 0.86<br>(0.63,1.17)     | 1.04<br>(0.85,1.29)     |
| <b>Model 3: Count vs. Fertile Controls</b>         |                          |                      |                            |                            |                         |                         |
| Azoospermia                                        | 0.91<br>(0.75,1.11)      | 1.00<br>(0.91,1.10)  | 0.84<br>(0.20,3.46)        | 1.20<br>(0.42,3.44)        | 2.12<br>(1.26,3.57)     | 1.57<br>(1.03,2.39)     |
| Oligozoospermic                                    | 0.95<br>(0.83,1.08)      | 1.01<br>(0.94,1.07)  | 1.83<br>(0.92,3.64)        | 1.13<br>(0.62,2.07)        | 0.92<br>(0.56,1.49)     | 0.83<br>(0.57,1.22)     |
| Normozoospermic                                    | 0.98<br>(0.93,1.03)      | 0.98<br>(0.96,1.00)  | 1.67<br>(1.13,2.45)        | 1.15<br>(0.85,1.56)        | 1.00<br>(0.80,1.26)     | 1.00<br>(0.84,1.19)     |
| Hyperzoospermic                                    | 1.01<br>(0.90,1.15)      | 0.99<br>(0.93,1.05)  | 0.51<br>(0.16,1.64)        | 0.83<br>(0.42,1.64)        | 1.03<br>(0.65,1.62)     | 0.98<br>(0.70,1.39)     |
| <b>Model 4: Motility vs. Fertile Controls</b>      |                          |                      |                            |                            |                         |                         |
| Azoospermia                                        | 0.91<br>(0.75,1.11)      | 1.00<br>(0.91,1.10)  | 0.84<br>(0.20,3.45)        | 1.20<br>(0.42,3.44)        | 2.12<br>(1.26,3.57)     | 1.57<br>(1.04,2.39)     |

|                                                                       |                     |                     |                     |                     |                     |                     |
|-----------------------------------------------------------------------|---------------------|---------------------|---------------------|---------------------|---------------------|---------------------|
| Q1 (0-49)                                                             | 1.08<br>(0.99,1.18) | 0.96<br>(0.92,1.00) | 1.67<br>(0.96,2.91) | 0.88<br>(0.55,1.42) | 1.03<br>(0.75,1.41) | 1.08<br>(0.87,1.35) |
| Q2 (50-59)                                                            | 0.98<br>(0.90,1.07) | 0.99<br>(0.94,1.03) | 1.76<br>(1.02,3.04) | 1.28<br>(0.83,1.98) | 1.05<br>(0.75,1.46) | 0.91<br>(0.70,1.18) |
| Q3 (60-69)                                                            | 0.93<br>(0.85,1.01) | 1.01<br>(0.97,1.05) | 1.73<br>(1.03,2.91) | 1.23<br>(0.80,1.91) | 0.88<br>(0.61,1.27) | 0.84<br>(0.63,1.11) |
| Q4 (70-100)                                                           | 0.94<br>(0.86,1.03) | 0.98<br>(0.95,1.02) | 1.2<br>(0.71,2.04)  | 1.09<br>(0.73,1.62) | 1.01<br>(0.72,1.40) | 1.05<br>(0.82,1.35) |
| <b>Model 5: Vitality vs. Fertile Controls (UU Sample Only)</b>        |                     |                     |                     |                     |                     |                     |
| Azoospermia                                                           | 0.95<br>(0.71,1.27) | 0.93<br>(0.80,1.07) | 1.12<br>(0.15,8.28) | 0.53<br>(0.07,3.86) | 3.20<br>(1.65,6.22) | 1.85<br>(1.04,3.29) |
| Q1 (0-45)                                                             | 0.94<br>(0.84,1.06) | 1.09<br>(1.03,1.16) | 1.61<br>(0.75,3.49) | 1.06<br>(0.56,2.00) | 1.04<br>(0.66,1.64) | 1.14<br>(0.84,1.56) |
| Q2 (46-55)                                                            | 1.00<br>(0.89,1.13) | 0.96<br>(0.91,1.02) | 1.95<br>(0.90,4.23) | 1.41<br>(0.80,2.48) | 0.77<br>(0.44,1.32) | 0.92<br>(0.63,1.33) |
| Q3 (56-64.4)                                                          | 1.07<br>(0.96,1.19) | 0.98<br>(0.93,1.04) | 0.95<br>(0.39,2.32) | 0.46<br>(0.20,1.09) | 0.97<br>(0.59,1.61) | 0.99<br>(0.69,1.43) |
| Q4 (64.5-94)                                                          | 0.98<br>(0.87,1.1)  | 1.01<br>(0.95,1.07) | 0.71<br>(0.24,2.06) | 1.28<br>(0.72,2.26) | 1.32<br>(0.87,1.99) | 0.96<br>(0.69,1.35) |
| <b>Model 6: Head Morphology vs. Fertile Controls (UU Sample Only)</b> |                     |                     |                     |                     |                     |                     |
| Azoospermia                                                           | 0.95<br>(0.71,1.27) | 0.93<br>(0.80,1.07) | 1.15<br>(0.15,8.53) | 0.53<br>(0.07,3.87) | 3.05<br>(1.57,5.92) | 1.86<br>(1.04,3.29) |
| Q1                                                                    | 1.00<br>(0.88,1.13) | 0.99<br>(0.93,1.06) | 1.48<br>(0.64,3.45) | 1.01<br>(0.51,1.99) | 0.84<br>(0.52,1.38) | 0.84<br>(0.57,1.23) |
| Q2                                                                    | 1.13<br>(1.02,1.26) | 1.00<br>(0.94,1.06) | 0.71<br>(0.25,2.04) | 1.08<br>(0.58,1.99) | 1.04<br>(0.64,1.69) | 1.18<br>(0.84,1.66) |
| Q3                                                                    | 0.91<br>(0.81,1.02) | 1.07<br>(1.01,1.14) | 1.43<br>(0.64,3.21) | 1.31<br>(0.72,2.37) | 1.07<br>(0.70,1.64) | 0.91<br>(0.63,1.30) |
| Q4                                                                    | 0.97<br>(0.86,1.09) | 1.01<br>(0.96,1.07) | 1.90<br>(0.92,3.92) | 0.78<br>(0.38,1.58) | 0.79<br>(0.47,1.31) | 1.15<br>(0.83,1.57) |

| <b>Model 7: Tail Morphology vs. Fertile Controls (UU Sample Only)</b>    |                     |                     |                     |                     |                     |                     |
|--------------------------------------------------------------------------|---------------------|---------------------|---------------------|---------------------|---------------------|---------------------|
| Azoospermia                                                              | 0.95<br>(0.71,1.27) | 0.93<br>(0.80,1.07) | 1.15<br>(0.15,8.53) | 0.53<br>(0.07,3.87) | 3.05<br>(1.57,5.92) | 1.86<br>(1.04,3.29) |
| Q1                                                                       | 1.02<br>(0.91,1.15) | 1.01<br>(0.95,1.08) | 1.85<br>(0.86,3.98) | 1.2<br>(0.61,2.35)  | 0.56<br>(0.31,1.01) | 1.00<br>(0.70,1.42) |
| Q2                                                                       | 1.02<br>(0.92,1.14) | 1.00<br>(0.94,1.06) | 1.06<br>(0.43,2.61) | 1.2<br>(0.66,2.17)  | 0.98<br>(0.60,1.59) | 0.94<br>(0.63,1.39) |
| Q3                                                                       | 1.06<br>(0.94,1.19) | 1.02<br>(0.97,1.08) | 1.60<br>(0.76,3.37) | 1.04<br>(0.57,1.93) | 0.95<br>(0.61,1.50) | 1.12<br>(0.81,1.56) |
| Q4                                                                       | 0.90<br>(0.80,1.02) | 1.04<br>(0.98,1.11) | 0.99<br>(0.38,2.60) | 0.73<br>(0.35,1.52) | 1.20<br>(0.80,1.80) | 0.97<br>(0.69,1.36) |
| <b>Model 8: Total Motile Count vs. Fertile Controls (UU Sample Only)</b> |                     |                     |                     |                     |                     |                     |
| Azoospermia                                                              | 0.95<br>(0.71,1.27) | 0.93<br>(0.80,1.07) | 1.12<br>(0.15,8.28) | 0.53<br>(0.07,3.86) | 3.20<br>(1.65,6.22) | 1.85<br>(1.04,3.29) |
| Q1                                                                       | 0.96<br>(0.86,1.08) | 0.98<br>(0.92,1.04) | 1.53<br>(0.71,3.30) | 1.39<br>(0.80,2.43) | 0.89<br>(0.55,1.44) | 1.13<br>(0.81,1.56) |
| Q2                                                                       | 0.98<br>(0.87,1.09) | 1.02<br>(0.97,1.08) | 1.84<br>(0.90,3.80) | 0.79<br>(0.39,1.61) | 1.40<br>(0.93,2.10) | 0.92<br>(0.64,1.33) |
| Q3                                                                       | 0.94<br>(0.84,1.06) | 1.03<br>(0.98,1.09) | 0.72<br>(0.25,2.08) | 0.86<br>(0.44,1.67) | 0.60<br>(0.34,1.08) | 0.92<br>(0.63,1.34) |
| Q4                                                                       | 1.13<br>(1.01,1.27) | 1.01<br>(0.95,1.07) | 1.04<br>(0.43,2.55) | 1.06<br>(0.57,1.97) | 1.21<br>(0.78,1.88) | 1.05<br>(0.75,1.47) |
|                                                                          |                     |                     |                     |                     |                     |                     |
| Models 1 - 4: IH and UU sample combined.                                 |                     |                     |                     |                     |                     |                     |
| HR= Hazard Ratio                                                         |                     |                     |                     |                     |                     |                     |
| FDR=First Degree Relative; SDR=Second Degree Relative                    |                     |                     |                     |                     |                     |                     |

**Supplemental Table 2. Cox Regression Results for Prostate, Breast, and Melanoma: Risk of cancer in first- and second-degree relatives of men with SA compared to fertile controls.**

|                                                    | <u>Prostate:</u><br><u>FDR</u> | <u>Prostate:SDR</u> | <u>Breast: FDR</u>  | <u>Breast:SDR</u>   | <u>Melanoma:</u><br><u>FDR</u> | <u>Melanoma:SDR</u> |
|----------------------------------------------------|--------------------------------|---------------------|---------------------|---------------------|--------------------------------|---------------------|
| <b>Model 1: Infertile vs. Fertile Controls</b>     | HR (95%<br>CI)                 | HR (95% CI)         | HR (95% CI)         | HR (95% CI)         | HR (95% CI)                    | HR (95% CI)         |
| Infertile                                          | 1.00<br>(0.91,1.11)            | 1.03<br>(0.98,1.09) | 1.08<br>(0.97,1.20) | 1.04<br>(0.98,1.10) | 1.07<br>(0.93,1.22)            | 1.09 (1.00,1.19)    |
| <b>Model 2: Concentration vs. Fertile Controls</b> |                                |                     |                     |                     |                                |                     |
| Azoospermia                                        | 0.82<br>(0.57,1.17)            | 1.15<br>(0.99,1.32) | 0.96<br>(0.66,1.40) | 1.01<br>(0.84,1.22) | 0.77<br>(0.47,1.26)            | 1.01 (0.76,1.34)    |
| Oligozoospermic                                    | 0.90<br>(0.71,1.14)            | 0.97<br>(0.87,1.08) | 0.98<br>(0.76,1.25) | 1.04<br>(0.92,1.17) | 1.28<br>(0.98,1.66)            | 1.03 (0.86,1.24)    |
| Normozoospermic                                    | 1.02<br>(0.90,1.15)            | 1.06<br>(1.00,1.12) | 1.10<br>(0.96,1.26) | 1.07<br>(1.01,1.15) | 1.11<br>(0.95,1.30)            | 1.13 (1.02,1.25)    |
| Hyperzoospermic                                    | 1.04<br>(0.91,1.19)            | 1.00<br>(0.94,1.07) | 1.10<br>(0.95,1.27) | 1.00<br>(0.92,1.08) | 0.98<br>(0.81,1.18)            | 1.06 (0.95,1.19)    |
| <b>Model 3: Count vs. Fertile Controls</b>         |                                |                     |                     |                     |                                |                     |
| Azoospermia                                        | 0.82<br>(0.57,1.17)            | 1.15<br>(0.99,1.32) | 0.96<br>(0.66,1.40) | 1.01<br>(0.84,1.21) | 0.77<br>(0.47,1.26)            | 1.01 (0.76,1.34)    |
| Oligozoospermic                                    | 0.78<br>(0.61,1.00)            | 0.97<br>(0.87,1.08) | 0.95<br>(0.74,1.23) | 0.99<br>(0.88,1.12) | 1.10<br>(0.83,1.47)            | 0.95 (0.78,1.16)    |
| Normozoospermic                                    | 1.03<br>(0.93,1.15)            | 1.03<br>(0.98,1.08) | 1.08<br>(0.96,1.21) | 1.05<br>(0.99,1.12) | 1.08<br>(0.93,1.24)            | 1.12 (1.02,1.22)    |
| Hyperzoospermic                                    | 1.1<br>(0.90,1.35)             | 1.09<br>(0.99,1.21) | 1.26<br>(1.00,1.57) | 1.02<br>(0.91,1.15) | 1.08<br>(0.81,1.43)            | 1.06 (0.88,1.27)    |
| <b>Model 4: Motility vs. Fertile Controls</b>      |                                |                     |                     |                     |                                |                     |

|                                                                       |                     |                     |                     |                     |                     |                  |
|-----------------------------------------------------------------------|---------------------|---------------------|---------------------|---------------------|---------------------|------------------|
| Azoospermia                                                           | 0.82<br>(0.57,1.17) | 1.15<br>(0.99,1.32) | 0.96<br>(0.66,1.40) | 1.01<br>(0.84,1.21) | 0.77<br>(0.47,1.26) | 1.01 (0.76,1.34) |
| Q1 (0-49)                                                             | 1.06<br>(0.91,1.24) | 1.02<br>(0.95,1.10) | 0.97<br>(0.81,1.16) | 1.03<br>(0.94,1.12) | 0.93<br>(0.75,1.14) | 1.11 (0.99,1.25) |
| Q2 (50-59)                                                            | 0.99<br>(0.84,1.16) | 1.03<br>(0.96,1.12) | 1.13<br>(0.95,1.34) | 1.04<br>(0.95,1.14) | 1.11<br>(0.90,1.36) | 1.06 (0.93,1.21) |
| Q3 (60-69)                                                            | 1.00<br>(0.85,1.17) | 1.04<br>(0.96,1.12) | 1.12<br>(0.95,1.34) | 1.04<br>(0.95,1.14) | 1.17<br>(0.95,1.43) | 1.15 (1.01,1.31) |
| Q4 (70-100)                                                           | 1.00<br>(0.86,1.17) | 1.03<br>(0.96,1.10) | 1.12<br>(0.95,1.33) | 1.06<br>(0.98,1.15) | 1.15<br>(0.94,1.41) | 1.05 (0.92,1.20) |
| <b>Model 5: Vitality vs. Fertile Controls (UU Sample Only)</b>        |                     |                     |                     |                     |                     |                  |
| Azoospermia                                                           | 0.80<br>(0.48,1.33) | 1.03<br>(0.82,1.30) | 1.05<br>(0.63,1.74) | 1.01<br>(0.77,1.34) | 0.73<br>(0.34,1.54) | 0.78 (0.47,1.29) |
| Q1 (0-45)                                                             | 0.92<br>(0.75,1.14) | 1.00<br>(0.90,1.11) | 0.92<br>(0.73,1.16) | 1.14<br>(1.01,1.27) | 1.19<br>(0.91,1.56) | 1.20 (1.01,1.43) |
| Q2 (46-55)                                                            | 1.03<br>(0.85,1.26) | 1.09<br>(0.99,1.21) | 1.28<br>(1.03,1.59) | 1.02<br>(0.90,1.16) | 1.04<br>(0.78,1.39) | 1.30 (1.09,1.55) |
| Q3 (56-64.4)                                                          | 1.18<br>(0.98,1.42) | 1.09<br>(0.99,1.20) | 1.07<br>(0.86,1.32) | 1.14<br>(1.02,1.28) | 1.02<br>(0.76,1.35) | 0.98 (0.81,1.19) |
| Q4 (64.5-94)                                                          | 1.03<br>(0.84,1.26) | 1.06<br>(0.96,1.17) | 1.06<br>(0.84,1.34) | 0.95<br>(0.84,1.07) | 1.07<br>(0.82,1.39) | 1.02 (0.86,1.23) |
| <b>Model 6: Head Morphology vs. Fertile Controls (UU Sample Only)</b> |                     |                     |                     |                     |                     |                  |
| Azoospermia                                                           | 0.79<br>(0.48,1.32) | 1.03<br>(0.82,1.30) | 1.06<br>(0.64,1.76) | 1.01<br>(0.77,1.33) | 0.73<br>(0.34,1.55) | 0.77 (0.47,1.28) |
| Q1                                                                    | 0.97<br>(0.78,1.20) | 0.96<br>(0.86,1.07) | 1.01<br>(0.79,1.29) | 1.11<br>(0.98,1.25) | 0.88<br>(0.65,1.20) | 1.16 (0.98,1.39) |
| Q2                                                                    | 1.03<br>(0.85,1.26) | 1.01<br>(0.92,1.12) | 1.25<br>(1.01,1.53) | 1.07<br>(0.95,1.20) | 0.99<br>(0.73,1.35) | 1.10 (0.91,1.34) |
| Q3                                                                    | 1.09<br>(0.90,1.32) | 1.15<br>(1.04,1.26) | 0.98<br>(0.77,1.24) | 1.05<br>(0.93,1.18) | 1.16<br>(0.90,1.50) | 1.02 (0.85,1.22) |

|                                                                          |                     |                     |                     |                     |                     |                  |
|--------------------------------------------------------------------------|---------------------|---------------------|---------------------|---------------------|---------------------|------------------|
| Q4                                                                       | 1.03<br>(0.84,1.26) | 1.14<br>(1.03,1.26) | 1.16<br>(0.93,1.45) | 1.04<br>(0.93,1.18) | 1.31<br>(1.02,1.68) | 1.17 (0.98,1.39) |
| <b>Model 7: Tail Morphology vs. Fertile Controls (UU Sample Only)</b>    |                     |                     |                     |                     |                     |                  |
| Azoospermia                                                              | 0.79<br>(0.48,1.32) | 1.03<br>(0.82,1.30) | 1.06<br>(0.64,1.76) | 1.01<br>(0.77,1.33) | 0.73<br>(0.34,1.55) | 0.77 (0.47,1.28) |
| Q1                                                                       | 0.96<br>(0.79,1.18) | 1.10<br>(0.99,1.22) | 1.10<br>(0.87,1.38) | 1.11<br>(0.98,1.26) | 1.10<br>(0.83,1.45) | 1.27 (1.06,1.51) |
| Q2                                                                       | 1.16<br>(0.96,1.40) | 0.99<br>(0.90,1.09) | 1.09<br>(0.87,1.35) | 1.06<br>(0.94,1.19) | 1.20<br>(0.91,1.58) | 1.10 (0.90,1.33) |
| Q3                                                                       | 1.03<br>(0.84,1.26) | 1.01<br>(0.91,1.12) | 1.24<br>(1.00,1.53) | 1.05<br>(0.93,1.18) | 1.22<br>(0.94,1.57) | 0.96 (0.79,1.15) |
| Q4                                                                       | 0.96<br>(0.77,1.19) | 1.19<br>(1.07,1.31) | 0.98<br>(0.76,1.25) | 1.05<br>(0.93,1.18) | 0.86<br>(0.63,1.16) | 1.15 (0.96,1.37) |
| <b>Model 8: Total Motile Count vs. Fertile Controls (UU Sample Only)</b> |                     |                     |                     |                     |                     |                  |
| Azoospermia                                                              | 0.80<br>(0.48,1.33) | 1.03<br>(0.82,1.30) | 1.05<br>(0.63,1.74) | 1.01<br>(0.77,1.34) | 0.73<br>(0.34,1.54) | 0.78 (0.47,1.29) |
| Q1                                                                       | 0.89<br>(0.72,1.10) | 1.02<br>(0.92,1.13) | 0.92<br>(0.72,1.16) | 1.09<br>(0.96,1.22) | 1.18<br>(0.91,1.54) | 1.06 (0.89,1.27) |
| Q2                                                                       | 1.11<br>(0.91,1.35) | 1.06<br>(0.96,1.17) | 1.17<br>(0.94,1.45) | 1.08<br>(0.96,1.22) | 1.05<br>(0.79,1.38) | 1.07 (0.89,1.29) |
| Q3                                                                       | 1.09<br>(0.89,1.33) | 1.04<br>(0.94,1.15) | 0.92<br>(0.72,1.18) | 1.04<br>(0.93,1.18) | 1.12<br>(0.85,1.48) | 1.29 (1.09,1.54) |
| Q4                                                                       | 1.10<br>(0.90,1.34) | 1.13<br>(1.03,1.25) | 1.32<br>(1.07,1.63) | 1.05<br>(0.93,1.17) | 0.97<br>(0.73,1.29) | 1.09 (0.90,1.31) |
| Models 1 - 4: IH and UU sample combined.                                 |                     |                     |                     |                     |                     |                  |
| HR= Hazard Ratio                                                         |                     |                     |                     |                     |                     |                  |

**Supplemental Table 3. Cox Regression Results for Ovarian, Bladder, and Kidney Cancer: Risk of cancer in first- and second-degree relatives of men with SA compared to fertile controls.**

|                                                    | <u>Ovarian:<br/>FDR</u> | <u>Ovarian:<br/>SDR</u> | <u>Bladder: FDR</u> | <u>Bladder: SDR</u> | <u>Kidney: FDR</u>  | <u>Kidney: SDR</u>  |
|----------------------------------------------------|-------------------------|-------------------------|---------------------|---------------------|---------------------|---------------------|
| <b>Model 1: Infertile vs. Fertile Controls</b>     | HR (95% CI)             | HR (95% CI)             | HR (95% CI)         | HR (95% CI)         | HR (95% CI)         | HR (95% CI)         |
| Infertile                                          | 0.88<br>(0.6,1.29)      | 1.03<br>(0.89,1.20)     | 1.06<br>(0.51,2.21) | 0.94<br>(0.71,1.24) | 1.53<br>(0.91,2.58) | 0.91<br>(0.71,1.16) |
| <b>Model 2: Concentration vs. Fertile Controls</b> |                         |                         |                     |                     |                     |                     |
| Azoospermia                                        | 0.99<br>(0.97,1.01)     | 1.26<br>(0.82,1.95)     | 0.00<br>(0.00,0.00) | 0.92<br>(0.38,2.26) | 2.47<br>(0.75,8.15) | 0.81<br>(0.36,1.85) |
| Oligozoospermic                                    | 1.06<br>(0.48,2.35)     | 1.14<br>(0.84,1.57)     | 1.03<br>(0.24,4.50) | 1.1<br>(0.63,1.91)  | 0.70<br>(0.16,2.96) | 1.12<br>(0.70,1.79) |
| Normozoospermic                                    | 0.94<br>(0.59,1.5)      | 1.04<br>(0.87,1.25)     | 1.19<br>(0.51,2.79) | 0.82<br>(0.58,1.16) | 1.55<br>(0.85,2.84) | 0.89<br>(0.67,1.19) |
| Hyperzoospermic                                    | 0.84<br>(0.49,1.46)     | 0.95<br>(0.77,1.18)     | 1.03<br>(0.41,2.58) | 1.07<br>(0.75,1.52) | 1.65<br>(0.86,3.18) | 0.88<br>(0.63,1.23) |
| <b>Model 3: Count vs. Fertile Controls</b>         |                         |                         |                     |                     |                     |                     |
| Azoospermia                                        | 0.00<br>(0.00,0.00)     | 1.26<br>(0.82,1.95)     | 0.00<br>(0.00,0.00) | 0.92<br>(0.38,2.26) | 2.48<br>(0.75,8.16) | 0.81<br>(0.36,1.85) |
| Oligozoospermic                                    | 0.63<br>(0.23,1.73)     | 1.26<br>(0.92,1.73)     | 1.06<br>(0.24,4.63) | 0.99<br>(0.55,1.8)  | 1.08<br>(0.32,3.61) | 1.07<br>(0.65,1.75) |
| Normozoospermic                                    | 0.89<br>(0.59,1.35)     | 0.97<br>(0.82,1.15)     | 1.29<br>(0.62,2.69) | 0.94<br>(0.7,1.26)  | 1.56<br>(0.90,2.7)  | 0.92<br>(0.71,1.19) |
| Hyperzoospermic                                    | 1.43<br>(0.71,2.91)     | 1.15<br>(0.84,1.57)     | 0.00<br>(0.00,0.00) | 0.89<br>(0.49,1.61) | 1.42<br>(0.49,4.13) | 0.75<br>(0.44,1.28) |
| <b>Model 4: Motility vs. Fertile Controls</b>      |                         |                         |                     |                     |                     |                     |

|                                                                       |                     |                     |                     |                     |                      |                     |
|-----------------------------------------------------------------------|---------------------|---------------------|---------------------|---------------------|----------------------|---------------------|
| Azoospermia                                                           | 0.00<br>(0.00,0.00) | 1.26<br>(0.82,1.95) | 0.00<br>(0.00,0.00) | 0.92<br>(0.38,2.26) | 2.48<br>(0.75,8.16)  | 0.81<br>(0.36,1.85) |
| Q1 (0-49)                                                             | 0.63<br>(0.31,1.28) | 1.12<br>(0.90,1.41) | 1.42<br>(0.57,3.56) | 1.04<br>(0.7,1.55)  | 0.94<br>(0.38,2.31)  | 0.70<br>(0.47,1.05) |
| Q2 (50-59)                                                            | 1.27<br>(0.73,2.21) | 1.14<br>(0.90,1.43) | 0.50<br>(0.07,3.73) | 0.75<br>(0.46,1.21) | 1.69<br>(0.80,3.55)  | 1.17<br>(0.82,1.67) |
| Q3 (60-69)                                                            | 0.91<br>(0.48,1.70) | 0.93<br>(0.73,1.19) | 1.85<br>(0.76,4.51) | 0.91<br>(0.56,1.46) | 1.35<br>(0.61,2.99)  | 0.88<br>(0.60,1.29) |
| Q4 (70-100)                                                           | 0.90<br>(0.48,1.68) | 0.92<br>(0.73,1.15) | 0.60<br>(0.09,4.18) | 1.03<br>(0.71,1.48) | 1.97<br>(0.98,3.98)  | 0.91<br>(0.64,1.31) |
| <b>Model 5: Vitality vs. Fertile Controls (UU Sample Only)</b>        |                     |                     |                     |                     |                      |                     |
| Azoospermia                                                           | 0.00<br>(0.00,0.00) | 1.48<br>(0.81,2.73) | 0.00<br>(0.00,0.00) | 0.83<br>(0.2,3.38)  | 2.34<br>(0.31,17.99) | 1.27<br>(0.47,3.46) |
| Q1 (0-45)                                                             | 0.47<br>(0.17,1.32) | 1.05<br>(0.76,1.45) | 0.56<br>(0.13,2.44) | 0.81<br>(0.44,1.5)  | 1.46<br>(0.45,4.79)  | 0.98<br>(0.60,1.59) |
| Q2 (46-55)                                                            | 1.48<br>(0.75,2.92) | 1.15<br>(0.84,1.59) | 1.31<br>(0.44,3.92) | 0.78<br>(0.39,1.53) | 0.40<br>(0.05,3.15)  | 0.54<br>(0.28,1.04) |
| Q3 (56-64.4)                                                          | 0.57<br>(0.22,1.45) | 1.12<br>(0.83,1.52) | 1.10<br>(0.36,3.32) | 0.78<br>(0.43,1.41) | 4.30<br>(1.83,10.07) | 1.00<br>(0.61,1.63) |
| Q4 (64.5-94)                                                          | 1.23<br>(0.59,2.59) | 0.75<br>(0.51,1.10) | 0.34<br>(0.04,2.53) | 0.81<br>(0.44,1.5)  | 2.70<br>(1.00,7.28)  | 0.86<br>(0.51,1.45) |
| <b>Model 6: Head Morphology vs. Fertile Controls (UU Sample Only)</b> |                     |                     |                     |                     |                      |                     |
| Azoospermia                                                           | 0.00<br>(0.00,0.00) | 1.49<br>(0.81,2.74) | 0.00<br>(0.00,0.00) | 0.82<br>(0.2,3.34)  | 2.23<br>(0.29,16.89) | 1.24<br>(0.46,3.38) |
| Q1                                                                    | 0.58<br>(0.20,1.62) | 0.98<br>(0.69,1.39) | 1.03<br>(0.30,3.55) | 1.01<br>(0.54,1.89) | 1.6<br>(0.50,5.13)   | 0.59<br>(0.30,1.14) |
| Q2                                                                    | 1.55<br>(0.82,2.94) | 0.98<br>(0.71,1.33) | 0.57<br>(0.13,2.51) | 0.63<br>(0.31,1.27) | 2.01<br>(0.72,5.57)  | 1.04<br>(0.66,1.65) |
| Q3                                                                    | 0.26<br>(0.06,1.06) | 1.03<br>(0.75,1.42) | 0.62<br>(0.14,2.69) | 0.85<br>(0.47,1.53) | 2.06<br>(0.75,5.68)  | 0.83<br>(0.50,1.38) |



|                                                                          |                     |                     |                     |                     |                      |                     |
|--------------------------------------------------------------------------|---------------------|---------------------|---------------------|---------------------|----------------------|---------------------|
| Q4                                                                       | 1.34<br>(0.67,2.72) | 1.14<br>(0.84,1.55) | 1.30<br>(0.43,3.92) | 0.6 (0.3,1.21)      | 2.93<br>(1.15,7.46)  | 0.71<br>(0.40,1.25) |
| <b>Model 7: Tail Morphology vs. Fertile Controls (UU Sample Only)</b>    |                     |                     |                     |                     |                      |                     |
| Azoospermia                                                              | 0.00<br>(0.00,0.00) | 1.49<br>(0.81,2.74) | 0.00<br>(0.00,0.00) | 0.82<br>(0.2,3.34)  | 2.23<br>(0.29,16.89) | 1.24<br>(0.46,3.38) |
| Q1                                                                       | 0.66<br>(0.26,1.68) | 1.14<br>(0.82,1.57) | 0.62<br>(0.14,2.72) | 0.95<br>(0.53,1.72) | 1.89<br>(0.64,5.57)  | 0.66<br>(0.37,1.21) |
| Q2                                                                       | 1.21<br>(0.60,2.44) | 0.82<br>(0.58,1.16) | 1.17<br>(0.32,4.25) | 0.76<br>(0.4,1.46)  | 1.67<br>(0.57,4.86)  | 0.48<br>(0.25,0.93) |
| Q3                                                                       | 1.17<br>(0.56,2.44) | 1.17<br>(0.87,1.58) | 1.57<br>(0.57,4.29) | 0.58<br>(0.29,1.16) | 1.75<br>(0.60,5.14)  | 1.20<br>(0.77,1.89) |
| Q4                                                                       | 0.71<br>(0.28,1.82) | 1.01<br>(0.72,1.42) | 0.00<br>(0.00,0.00) | 0.78<br>(0.42,1.47) | 3.43<br>(1.39,8.48)  | 0.85<br>(0.50,1.45) |
| <b>Model 8: Total Motile Count vs. Fertile Controls (UU Sample Only)</b> |                     |                     |                     |                     |                      |                     |
| Azoospermia                                                              | 0.00<br>(0.00,0.00) | 1.48<br>(0.81,2.73) | 0.00<br>(0.00,0.00) | 0.83<br>(0.2,3.38)  | 2.35<br>(0.31,18.02) | 1.27<br>(0.47,3.46) |
| Q1                                                                       | 0.69<br>(0.29,1.64) | 1.12<br>(0.82,1.54) | 1.10<br>(0.36,3.32) | 0.77<br>(0.41,1.42) | 1.03<br>(0.28,3.83)  | 1.02<br>(0.63,1.63) |
| Q2                                                                       | 0.88<br>(0.39,1.98) | 1.00<br>(0.72,1.37) | 0.30<br>(0.04,2.28) | 0.62<br>(0.31,1.24) | 3.02<br>(1.16,7.85)  | 0.62<br>(0.34,1.14) |
| Q3                                                                       | 0.91<br>(0.40,2.05) | 0.98<br>(0.70,1.36) | 1.58<br>(0.58,4.32) | 1.16<br>(0.69,1.95) | 2.25<br>(0.80,6.32)  | 1.03<br>(0.63,1.68) |
| Q4                                                                       | 1.18<br>(0.57,2.47) | 0.98<br>(0.70,1.37) | 0.32<br>(0.04,2.40) | 0.65<br>(0.33,1.26) | 3.03<br>(1.16,7.89)  | 0.73<br>(0.42,1.27) |
| Models 1 - 4: IH and UU sample combined.                                 |                     |                     |                     |                     |                      |                     |
| HR= Hazard Ratio                                                         |                     |                     |                     |                     |                      |                     |
| FDR=First Degree Relative; SDR=Second Degree Relative                    |                     |                     |                     |                     |                      |                     |
|                                                                          |                     |                     |                     |                     |                      |                     |
